# Supplementary material for: Investigating the Impact of Extruded Dehulled Adlay with Specific In Vitro Digestion Properties on Blood Lipids in Subjects with Mild to Moderate Dyslipidemia
Source: MDPI journal article supplement (doi:10.3390/foods11040493), 2022-02-09
Supplement: s1 [file s1]

**Table S1.** Analysis of macronutrients from 24-h dietary recalls in all subjects ( $n = 30$ ).

|          | Carbohydrates (g)  |                        | Fats (g)          |                        | Proteins (g)      |                        |
|----------|--------------------|------------------------|-------------------|------------------------|-------------------|------------------------|
|          | Mean $\pm$ SD      | $p$ Value <sup>1</sup> | Mean $\pm$ SD     | $p$ Value <sup>1</sup> | Mean $\pm$ SD     | $p$ Value <sup>1</sup> |
| Baseline | 185.28 $\pm$ 37.86 | -                      | 64.21 $\pm$ 11.43 | -                      | 59.76 $\pm$ 11.02 | -                      |
| Week 4   | 191.30 $\pm$ 36.89 | 0.841                  | 63.67 $\pm$ 10.70 | 0.995                  | 57.27 $\pm$ 10.90 | 0.689                  |
| Week 8   | 183.48 $\pm$ 38.36 | 0.994                  | 62.11 $\pm$ 10.43 | 0.785                  | 55.52 $\pm$ 11.07 | 0.286                  |
| Week 12  | 182.18 $\pm$ 23.54 | 0.973                  | 62.26 $\pm$ 9.94  | 0.819                  | 56.6 $\pm$ 9.34   | 0.520                  |

Data were expressed as mean  $\pm$  SD

<sup>1</sup> $p$  value: Statistical analysis was performed to test difference between each follow-up versus baseline by repeated-measures one-way ANOVA

**Table S2.** Analysis of macronutrients from 24-h dietary recalls in the hypercholesterolemia group ( $n = 26$ ).

|          | Carbohydrates (g)  |                             | Fats (g)          |                             | Proteins (g)      |                             |
|----------|--------------------|-----------------------------|-------------------|-----------------------------|-------------------|-----------------------------|
|          | Mean $\pm$ SD      | <i>p</i> Value <sup>1</sup> | Mean $\pm$ SD     | <i>p</i> Value <sup>1</sup> | Mean $\pm$ SD     | <i>p</i> Value <sup>1</sup> |
| Baseline | 188.13 $\pm$ 38.11 | -                           | 65.19 $\pm$ 10.92 | -                           | 60.69 $\pm$ 10.96 | -                           |
| Week 4   | 190.7 $\pm$ 35.88  | 0.987                       | 63.26 $\pm$ 11.42 | >0.999                      | 57.90 $\pm$ 11.53 | 0.681                       |
| Week 8   | 184.78 $\pm$ 38.72 | 0.973                       | 62.19 $\pm$ 10.59 | >0.999                      | 57.12 $\pm$ 11.20 | 0.503                       |
| Week 12  | 181.67 $\pm$ 25.16 | 0.844                       | 62.78 $\pm$ 10.24 | >0.999                      | 57.14 $\pm$ 9.90  | 0.507                       |

Data were expressed as mean  $\pm$  SD

<sup>1</sup>p value: Statistical analysis was performed to test difference between each follow-up versus baseline by repeated-measures one-way ANOVA

**Table S3.** Analysis of macronutrients from 24-h dietary recalls in the high LDL group ( $n = 22$ ).

|          | Carbohydrates (g)  |                        | Fats (g)          |                        | Proteins (g)      |                        |
|----------|--------------------|------------------------|-------------------|------------------------|-------------------|------------------------|
|          | Mean $\pm$ SD      | $p$ Value <sup>1</sup> | Mean $\pm$ SD     | $p$ Value <sup>1</sup> | Mean $\pm$ SD     | $p$ Value <sup>1</sup> |
| Baseline | 189.15 $\pm$ 36.86 | -                      | 64.49 $\pm$ 11.64 | -                      | 62.17 $\pm$ 10.93 | -                      |
| Week 4   | 192.85 $\pm$ 38.38 | 0.975                  | 63.67 $\pm$ 12.70 | 0.991                  | 58.62 $\pm$ 11.36 | 0.563                  |
| Week 8   | 188.39 $\pm$ 41.25 | >0.999                 | 62.79 $\pm$ 12.16 | 0.929                  | 57.85 $\pm$ 11.81 | 0.408                  |
| Week 12  | 178.7 $\pm$ 27.79  | 0.660                  | 63.03 $\pm$ 9.17  | 0.953                  | 56.25 $\pm$ 8.80  | 0.175                  |

Data were expressed as mean  $\pm$  SD

<sup>1</sup> $p$  value: Statistical analysis was performed to test difference between each follow-up versus baseline by repeated-measures one-way ANOVA

**Table S4.** Analysis of macronutrients from 24-h dietary recalls in the low HDL group ( $n = 11$ ).

|          | Carbohydrates (g)  |                             | Fats (g)          |                             | Proteins (g)     |                             |
|----------|--------------------|-----------------------------|-------------------|-----------------------------|------------------|-----------------------------|
|          | Mean $\pm$ SD      | <i>p</i> Value <sup>1</sup> | Mean $\pm$ SD     | <i>p</i> Value <sup>1</sup> | Mean $\pm$ SD    | <i>p</i> Value <sup>1</sup> |
| Baseline | 167.42 $\pm$ 39.69 | -                           | 60.62 $\pm$ 10.01 | -                           | 54.52 $\pm$ 9.22 | -                           |
| Week 4   | 177.88 $\pm$ 35.57 | 0.803                       | 65.17 $\pm$ 4.74  | 0.394                       | 55.00 $\pm$ 5.65 | 0.998                       |
| Week 8   | 166.68 $\pm$ 29.04 | >0.999                      | 60.41 $\pm$ 9.29  | >0.999                      | 55.96 $\pm$ 9.84 | 0.953                       |
| Week 12  | 173.36 $\pm$ 26.99 | 0.954                       | 60.4 $\pm$ 6.07   | >0.999                      | 55.23 $\pm$ 6.86 | 0.994                       |

Data were expressed as mean  $\pm$  SD

<sup>1</sup>*p* value: Statistical analysis was performed to test difference between each follow-up versus baseline by repeated-measures one-way ANOVA
