# Supplementary material for: Investigating the Impact of Extruded Dehulled Adlay with Specific In Vitro Digestion Properties on Blood Lipids in Subjects with Mild to Moderate Dyslipidemia
Source: Foods. 2022 Feb 9;11(4):493. doi: 10.3390/foods11040493 (PMC8871124; doi:10.3390/foods11040493)
Supplement: Supplementary file 1 [file foods-11-00493-s001.zip]

Archive with 4 entries (4 files):
- Figure S1 Standard curve for the quantitation of campesterol.tiff
- Figure S2 Standard curve for the quantitation of stigmasterol.tiff
- Figure S3 Standard curve for the quantitation of beta-sitosterol.tiff
- Suppl Tables S1-4.pdf
